# Supplementary material for: Inverted organic solar cells enhanced by grating-coupled surface plasmons and waveguide modes
Source: Royal Society of Chemistry journal article supplement (doi:10.1039/c6cp06931b), 2016-12-17
Supplement: c6cp06931b1.pdf [file c6cp06931b1.pdf]

## Electronic Supplementary Information

Inverted Organic Solar Cells Enhanced by Grating-coupled Surface Plasmons and Waveguide Modes

Kazuma Hara,<sup>a</sup> Chutiparn Lertvachirapaiboon,<sup>a</sup> Ryoussuke Ishikawa,<sup>a</sup> Yasuo Ohdaira,<sup>ab</sup> Kazunari Shinbo,<sup>ab</sup> Keizo Kato,<sup>ab</sup> Futao Kaneko<sup>ab</sup> and Akira Baba<sup>\*ab</sup>

<sup>a</sup>Graduate School of Science and Technology, Niigata University, 8050 Ikarashi 2-nocho, Nishi-ku, Niigata 950-2181, Japan

<sup>b</sup>Center for Transdisciplinary Research, Niigata University, 8050 Ikarashi 2-nocho, Nishi-ku, Niigata 950-2181, Japan

\*ababa@eng.niigata-u.ac.jp

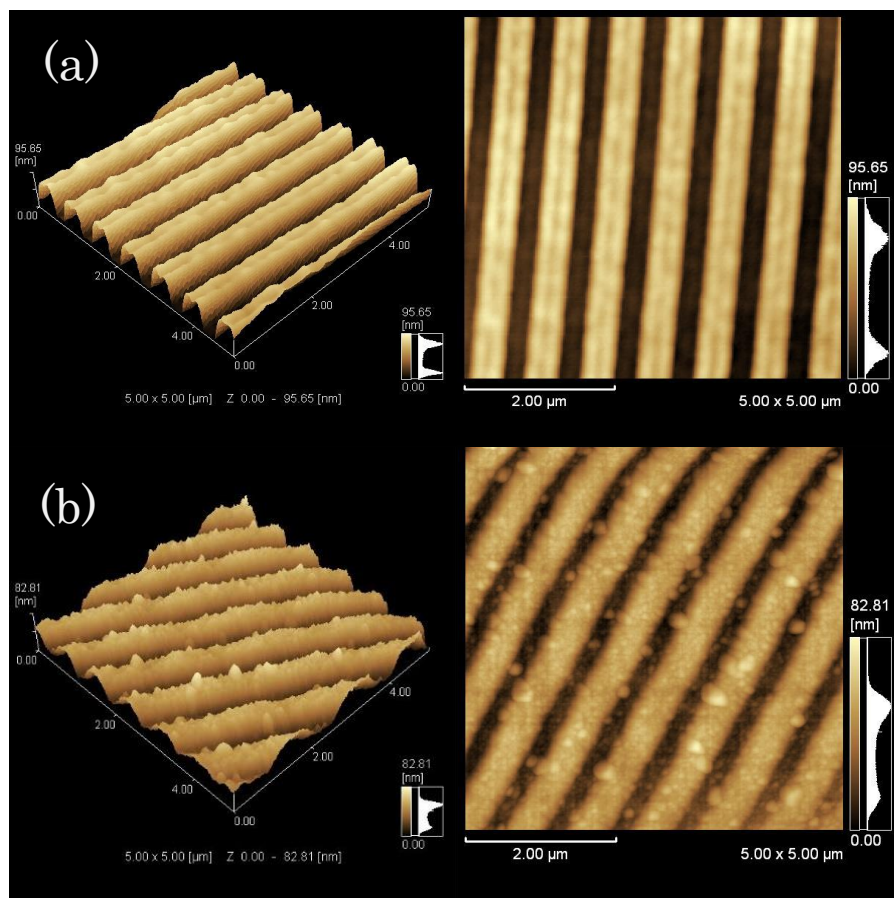

Figure S1. AFM images of (a) P3HT:PCBM and (b) Au electrode surfaces

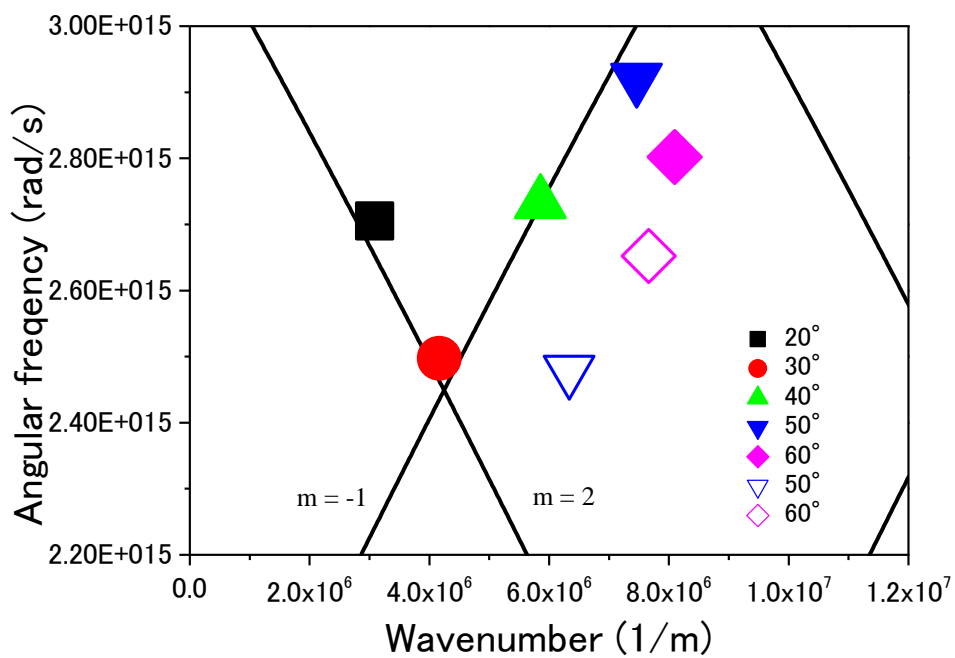

Figure S2. Experimental reflectivity dip angles with p-pol light (symbols) and calculated SP dispersion branches (solid lines) on the Au grating (a) and on the Ag grating (b).

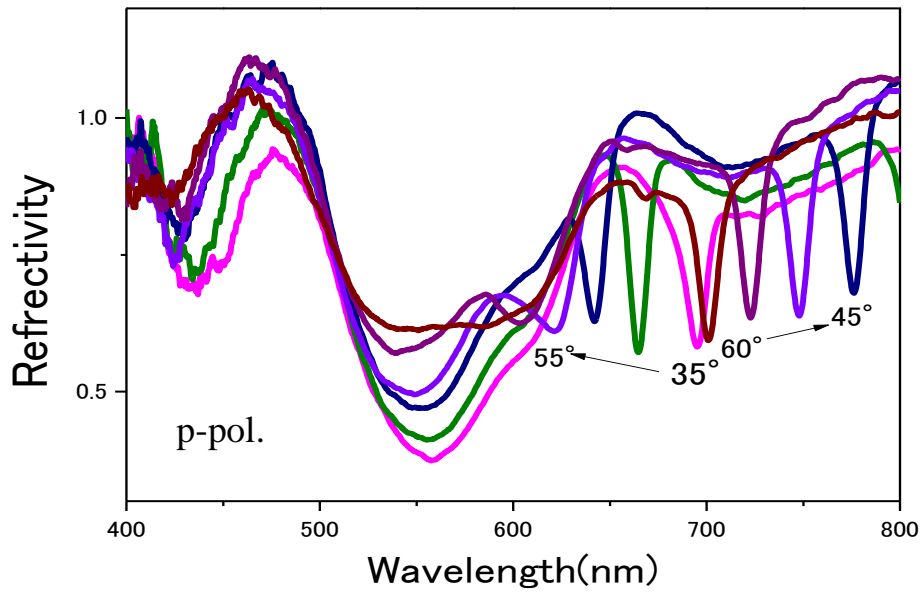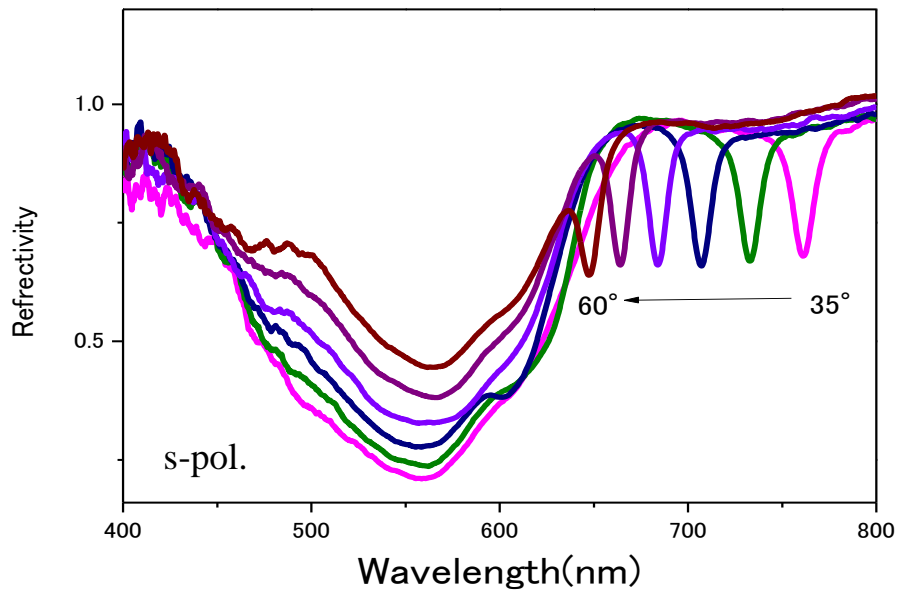

Figure S3. Reflectivity measurements of inverted OSCs by illumination with p-pol or s-pol light for different conditions (with grating, TiO<sub>2</sub>: 70 nm)

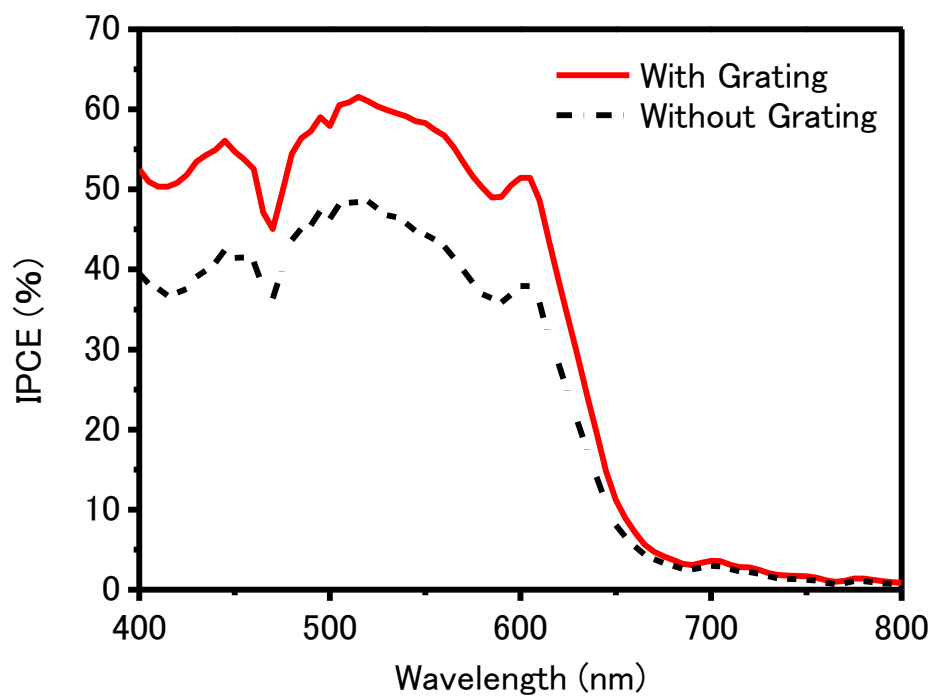

Figure S4. IPCE properties of inverted OSCs without grating and with grating structure.

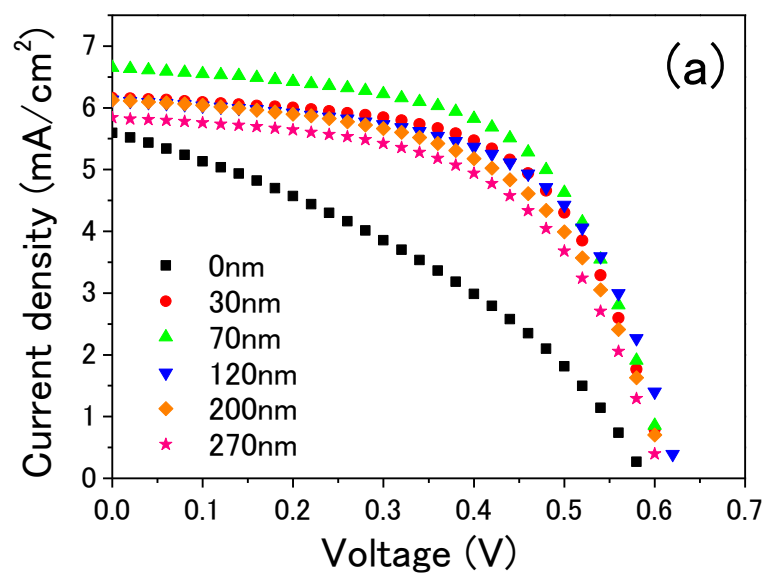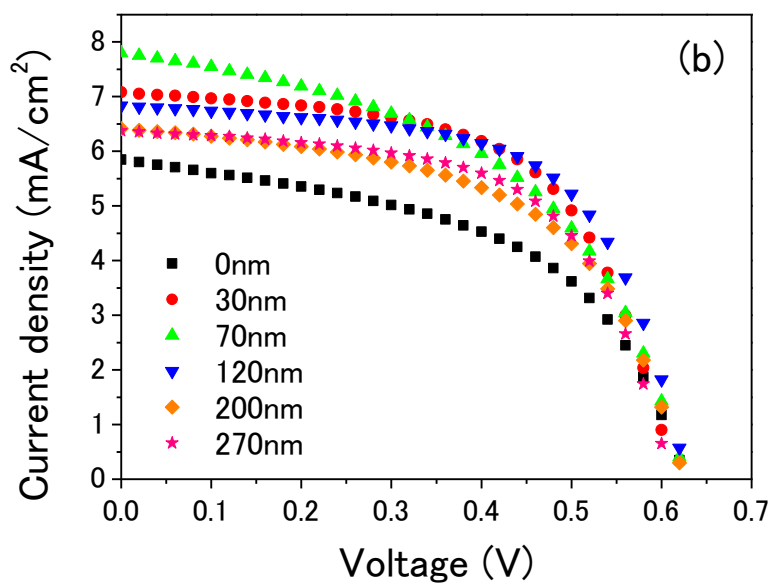

Figure S5. J-V curves of inverted OSCs as a function of TiO<sub>2</sub> layer thickness (a) without grating and (b) with grating structure.

Table S1 The photovoltaic parameters of inverted OSCs as a function of TiO<sub>2</sub> layer thickness without grating and with grating structure.

| With grating             | 0nm  | 30nm  | 70nm  | 120nm  | 200nm  | 270 nm |
|--------------------------|------|-------|-------|--------|--------|--------|
| Jsc(mA/cm <sup>2</sup> ) | 5.85 | 7.08  | 7.80  | 6.83   | 6.41   | 6.37   |
| Voc(V)                   | 0.63 | 0.61  | 0.63  | 0.63   | 0.61   | 0.63   |
| FF                       | 0.51 | 0.63  | 0.62  | 0.62   | 0.60   | 0.56   |
| Eta(%)                   | 2.50 | 3.63  | 4.02  | 3.53   | 3.14   | 2.95   |
| Without grating          | 0 nm | 30 nm | 70 nm | 120 nm | 200 nm | 270 nm |
| Jsc(mA/cm <sup>2</sup> ) | 5.59 | 6.16  | 6.65  | 6.13   | 6.13   | 5.84   |
| Voc(V)                   | 0.59 | 0.61  | 0.61  | 0.63   | 0.61   | 0.61   |
| FF                       | 0.37 | 0.60  | 0.60  | 0.59   | 0.57   | 0.57   |
| Eta(%)                   | 1.62 | 3.04  | 3.24  | 3.03   | 2.84   | 2.69   |

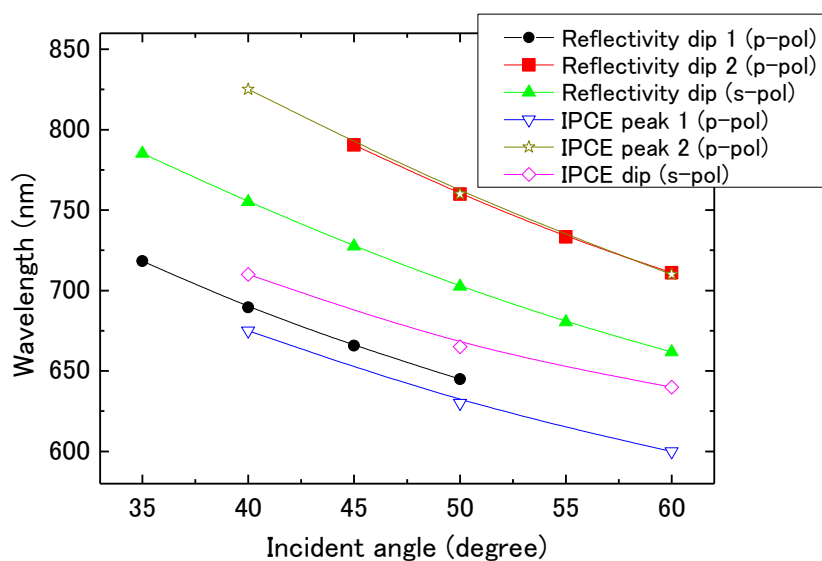

Figure S6. The relationship between the reflectivity dip wavelengths and the IPCE peak and dip wavelengths
